# Supplementary material for: Geochemical characterization of groundwater evolution south of Grand Canyon, Arizona (USA)
Source: Springer Nature journal article supplement (doi:10.1007/s10040-020-02192-0), 2020-06-18
Supplement: MOESM1 [file 18098294]

## Hydrogeology Journal-Electronic Supplementary Material

### Geochemical characterization of groundwater evolution south of Grand Canyon, Arizona (USA)

Kimberly R. Beisner<sup>1,\*</sup>, John E. Solder<sup>2</sup>, Fred D. Tillman<sup>3</sup>, Jessica R. Anderson<sup>4</sup>, and Ronald C. Antweiler<sup>5</sup>

1. US Geological Survey, 6700 Edith Blvd NE, Albuquerque, New Mexico, 87113, USA

2. US Geological Survey, 2329 West Orton Circle, Salt Lake City, Utah, 84119, USA

3. US Geological Survey, 520 N. Park Ave, Tucson, Arizona, 85719, USA

4. US Geological Survey, 2255 N. Gemini Drive, Flagstaff, Arizona, 86001, USA

5. US Geological Survey, 3215 Marine St. Building 6, Boulder, Colorado, 80309, USA

\* corresponding author email: [kbeisner@usgs.gov](mailto:kbeisner@usgs.gov)

Table S1. Water chemistry data for groundwater sites in the Redwall-Muav aquifer south of Grand Canyon. Data downloaded from USGS (2019) from 2000 to 2001 also published in Monroe et al. (2005) and data from 2002 published in Bills et al. (2007). Abbreviations: °C, degrees Celsius; µS/cm, microsiemens per centimeter; mg/L, milligrams per liter; µg/L, micrograms per liter; pCi/L, picocuries per liter; <, less than laboratory reporting level; R, less than radiochemistry laboratory reporting level; NA indicates data are not available, values represent filtered (0.45 µm) concentrations unless otherwise noted.

| Site Number | USGS Station ID | Site Name             | Sample Date | Sample Time | Temperature, °C | Specific conductance, $\mu\text{S}/\text{cm}$ at 25°C | Dissolved oxygen, mg/L | pH, standard units |
|-------------|-----------------|-----------------------|-------------|-------------|-----------------|-------------------------------------------------------|------------------------|--------------------|
| 1           | 360700111413701 | Blue Spring           | 11/14/2017  | 12:20       | 19.3            | 4790                                                  | 5.3                    | 6.4                |
| 2           | 360020111560401 | Red Canyon Spring     | 9/26/2001   | 15:20       | 17              | 293                                                   | 7.2                    | 8.2                |
| 3           | 360025111571501 | JT Spring             | 5/11/2001   | 12:45       | 18.3            | 420                                                   | 8.2                    | 8.2                |
| 4           | 360100111582001 | Miners Spring         | 5/24/2000   | 16:40       | 15.8            | 402                                                   | 11.4                   | 8.8                |
| 5           | 360040112000901 | Grapevine Spring      | 5/19/2018   | 14:00       | 14.6            | 357                                                   | 8.8                    | 7.8                |
| 6           | 360400112025001 | Lonetree Spring       | 4/11/2001   | 16:20       | 9               | 659                                                   | 10                     | 7.8                |
| 7           | 360410112055700 | Pipe Spring           | 9/26/2016   | 14:00       | 18.3            | 551                                                   | 6.4                    | 6.6                |
| 8           | 355308112054101 | Canyon Mine Well      | 6/28/2016   | 12:00       | 26.5            | 451                                                   | 5.1                    | 7.4                |
| 9           | 360439112073901 | Indian Gardens Spring | 9/27/2016   | 14:30       | 19.5            | 430                                                   | 5.8                    | 6.9                |
| 10          | 360443112083300 | Horn Spring           | 9/27/2016   | 9:30        | 17.5            | 679                                                   | 6                      | 6.9                |
| 11          | 360439112094101 | Salt Creek Spring     | 12/6/2000   | NA          | 7.2             | 656                                                   | 9.8                    | 8.2                |
| 12          | 360356112103201 | Monument Spring       | 12/5/2000   | 15:30       | 18              | 533                                                   | 8.1                    | 7.5                |
| 13          | 360347112133001 | Hermit Spring         | 4/9/2017    | 14:30       | 19.4            | 421                                                   | 8.7                    | 7                  |
| 14          | 360411112141701 | Boucher East          | 4/8/2017    | 17:30       | NA              | 406                                                   | 7.5                    | 7.3                |
| 15          | 360658112170701 | Slate Spring          | 4/24/2002   | 10:00       | NA              | NA                                                    | NA                     | NA                 |
| 16          | 360711112184601 | Sapphire Spring       | 4/23/2002   | 12:00       | NA              | NA                                                    | NA                     | NA                 |
| 17          | 360952112203501 | Ruby Spring           | 4/21/2002   | 16:00       | NA              | NA                                                    | NA                     | NA                 |
| 18          | 361141112211101 | Serpentine Spring     | 4/21/2002   | 11:00       | 10.3            | 492                                                   | 11                     | 8.3                |
| 19          | 361119112271501 | Royal Arch Spring     | 5/24/2018   | 9:00        | 19.6            | 873                                                   | 7.2                    | 7.7                |
| 20          | 361648112315101 | Fossil Canyon Spring  | 5/18/2002   | 16:50       | NA              | NA                                                    | NA                     | NA                 |
| 21          | 362353112340301 | 140 Mile Spring       | 2/23/2018   | 11:30       | 10              | 1020                                                  | 9.5                    | 7.7                |
| 22          | 361928112393201 | Matkatamiba Spring    | 5/5/2002    | 11:20       | 19.5            | 1300                                                  | 6.9                    | 7.2                |
| 23          | 360823112394802 | Bar 4 Well            | 10/1/2015   | 15:00       | 21.4            | 1650                                                  | 0.7                    | 7.4                |
| 24          | 361303112411200 | Havasu Spring         | 10/11/2016  | 15:15       | 21.4            | 1030                                                  | 5.7                    | 6.4                |
| 25          | 361352112413201 | Supai Well 3          | 10/12/2016  | 14:00       | 21.3            | 1080                                                  | 3                      | 6.4                |
| 26          | 361524112420400 | Fern Spring           | 10/12/2016  | 9:00        | 20.4            | 986                                                   | 3.1                    | 6.5                |
| 27          | 361518112523901 | National Canyon       | 2/27/2018   | 10:30       | 14              | 1840                                                  | 5.7                    | 7.4                |
| 28          | 361148113045900 | Warm Springs          | 5/20/2002   | 9:15        | NA              | NA                                                    | NA                     | NA                 |

| Site Number | Ca, mg/L | Mg, mg/L | Na, mg/L | K, mg/L | Cl, mg/L | SO4, mg/L | F, mg/L | Si, mg/L as SiO2 | As, µg/L | Ba, µg/L | Be, µg/L | Bi, µg/L | B, µg/L | Cd, µg/L |
|-------------|----------|----------|----------|---------|----------|-----------|---------|------------------|----------|----------|----------|----------|---------|----------|
| 1           | 218      | 68       | 790      | 5.8     | 1295     | 167       | 0.19    | 15               | 6        | 69       | 0.04     | 0.02     | 255     | 0.09     |
| 2           | 27       | 22       | 6.1      | 2.1     | 13       | 17        | NA      | 8.8              | 17       | 343      | < 0.006  | < 0.001  | 70      | < 0.002  |
| 3           | 34       | 25       | 10       | 4.1     | 15       | 45        | NA      | 8.4              | 14       | 118      | < 0.008  | < 0.001  | 100     | < 0.001  |
| 4           | 22       | 27       | 12       | 3.6     | 19       | 35        | NA      | 9.6              | 17       | 127      | < 0.005  | < 0.002  | 100     | 0.002    |
| 5           | 36       | 24       | 3.5      | 1.4     | 4.8      | 6         | 0.13    | 8.2              | 5.8      | 358      | 0.0017   | < 0.002  | 25      | 0.001    |
| 6           | 57       | 41       | 25       | 10      | 20       | 170       | NA      | 8.5              | 1        | 37       | < 0.008  | < 0.001  | 120     | < 0.001  |
| 7           | 53       | 35       | 9.3      | 3.8     | 15.8     | NA        | 0.17    | 11               | 0.94     | 64       | < 0.0007 | < 0.02   | 52      | 0.019    |
| 8           | 41       | 28       | 7.8      | 2.5     | 6.7      | 18        | 0.3     | 9.6              | 0.5      | 99       | 0.001    | < 0.100  | 39      | < 0.0020 |
| 9           | 42       | 29       | 5.4      | 1.4     | 9.7      | 14        | 0.12    | 9.7              | 2.2      | 313      | 0.001    | < 0.02   | 26      | 0.004    |
| 10          | 53       | 44       | 22       | 7.2     | 33       | 101.8     | 0.25    | 12               | 2.8      | 48       | 0.0018   | < 0.020  | 108     | 0.021    |
| 11          | 55       | 43       | 15       | 4.1     | 18       | 177       | NA      | 8.9              | 2.3      | 28       | 0.008    | < 0.003  | 90      | < 0.003  |
| 12          | 43       | 30       | 18       | 1.6     | 43       | 20        | NA      | 9.6              | 4        | 275      | 0.005    | < 0.003  | 40      | < 0.003  |
| 13          | 44       | 27       | 5.6      | 1.6     | 11.6     | 14.2      | 0.15    | 9.3              | 1.6      | 227      | 0.004    | 0.07     | 26      | < 0.0030 |
| 14          | 43       | 26       | 4.7      | 1.4     | 9.4      | 16.7      | 0.16    | 9.5              | 1.5      | 161      | 0.0034   | 0.05     | 24      | < 0.003  |
| 15          | 42       | 46       | 21       | 6.3     | 34       | 130       | 0.4     | 11               | 4.8      | 48       | < 0.020  | < 0.0010 | 170     | 0.003    |
| 16          | 72       | 52       | 16       | 5.8     | 21       | 190       | 0.3     | 9.8              | 1.4      | 32       | < 0.020  | < 0.0010 | 110     | < 0.002  |
| 17          | 230      | 96       | 25       | 12      | 28       | 750       | 0.7     | 12               | 0.46     | 21       | < 0.020  | < 0.0010 | 130     | 0.005    |
| 18          | 41       | 36       | 12       | 5.8     | 15       | 100       | 0.3     | 9                | 2.2      | 30       | < 0.007  | < 0.0009 | 90      | < 0.002  |
| 19          | 90       | 40       | 13       | 3.9     | 22       | 193       | 0.3     | 11               | 3        | 28       | 0.0026   | < 0.002  | 72      | 0.001    |
| 20          | 180      | 93       | 32       | 11      | 40       | 720       | 1.1     | 13               | 1.1      | 13       | < 0.020  | < 0.0010 | 230     | < 0.002  |
| 21          | 79       | 52       | 35       | 10      | 34.3     | 301       | 0.41    | 12               | 0.47     | 22       | 0.0021   | 0.0032   | 201     | 0.011    |
| 22          | 180      | 89       | 17       | 6       | 18       | 680       | 0.8     | 11               | 0.89     | 13       | < 0.020  | 0.003    | 130     | 0.006    |
| 23          | 219      | 99       | 22       | 5.2     | 7.8      | 851       | 0.99    | 9.7              | 6.7      | 9.6      | 0.014    | < 0.05   | 150     | 0.01     |
| 24          | 128      | 42       | 33       | 4.6     | 46       | 34.2      | 0.16    | 18               | 14       | 154      | 0.02     | < 0.020  | 259     | 0.02     |
| 25          | 134      | 43       | 33       | 4.6     | 45       | 40.5      | 0.16    | 18               | 5.2      | 152      | 0.0041   | < 0.020  | 257     | 0.026    |
| 26          | 108      | 45       | 35       | 5       | 47.8     | 42.2      | 0.16    | 20               | 7.1      | 146      | 0.003    | < 0.020  | 274     | 0.014    |
| 27          | 259      | 89       | 23       | 5.8     | 17.6     | 991       | 0.33    | 13               | 1.3      | 16       | 0.0025   | < 0.0009 | 118     | 0.011    |
| 28          | 150      | 60       | 85       | 7.2     | 86       | 33        | 0.5     | 17               | 12       | 200      | 0.02     | < 0.0010 | 1000    | 0.013    |

| Site Number | Cr, µg/L | Co, µg/L | Cu, µg/L | Fe, µg/L | Pb, µg/L | Mn, µg/L | Tl, µg/L | Mo, µg/L | Ni, µg/L | Sr, µg/L | V, µg/L | Zn, µg/L | Sb, µg/L | Sn, µg/L |
|-------------|----------|----------|----------|----------|----------|----------|----------|----------|----------|----------|---------|----------|----------|----------|
| 1           | < 0.4    | NA       | 1.5      | 24       | 0.22     | 7.7      | 0.15     | 1.7      | NA       | 1080     | 1.5     | 15       | 0.1      | 0.2      |
| 2           | 0.9      | < 0.003  | < 0.02   | 1.4      | 0.012    | 0.12     | 0.025    | 2        | < 0.1    | 110      | 1.4     | 2.6      | 0.013    | NA       |
| 3           | 0.5      | < 0.008  | 0.02     | < 0.2    | 0.017    | 0.06     | 0.029    | 2        | < 0.2    | 170      | 1.8     | 3.7      | 0.02     | NA       |
| 4           | 0.2      | < 0.008  | < 0.06   | 0.7      | 0.003    | 0.05     | 0.028    | 2        | 1        | 170      | 2       | 3.8      | 0.016    | NA       |
| 5           | 0.87     | 0.008    | 0.31     | < 2.00   | 0.067    | < 0.3    | 0.021    | 0.36     | 0.6      | 76       | 1.1     | 1.3      | 0.081    | NA       |
| 6           | < 0.2    | < 0.008  | < 0.01   | < 0.2    | 0.007    | 0.05     | 0.013    | 2        | < 0.2    | 310      | 0.9     | 0.4      | 0.008    | NA       |
| 7           | 0.53     | < 0.10   | 0.2      | < 0.7    | < 0.009  | 0.1      | 0.022    | 0.9      | < 0.4    | 156      | 0.86    | 0.9      | 0.01     | < 0.10   |
| 8           | < 0.08   | < 0.100  | 1.2      | 14       | 0.28     | 4.2      | 0.04     | 1.2      | 0.7      | 260      | < 0.10  | 7.4      | 0.072    | < 0.10   |
| 9           | 0.57     | < 0.10   | 0.23     | < 0.7    | < 0.009  | < 0.05   | 0.025    | 0.5      | < 0.4    | 106      | 1       | 1.6      | 0.02     | < 0.10   |
| 10          | 0.35     | < 0.10   | 0.15     | < 0.7    | < 0.009  | 0.12     | 0.026    | 3        | < 0.4    | 251      | 1.3     | 1.1      | 0.02     | < 0.10   |
| 11          | < 0.1    | < 0.008  | < 0.04   | < 0.5    | 0.014    | 0.05     | 0.019    | 2        | < 0.1    | 240      | 0.6     | 1.3      | 0.01     | NA       |
| 12          | 0.2      | < 0.008  | 0.55     | < 0.5    | 0.26     | < 0.03   | 0.1      | 0.9      | 0.1      | 130      | 0.7     | 6.4      | 0.014    | NA       |
| 13          | 0.51     | 0.072    | 0.41     | 2        | < 0.002  | 0.07     | 0.021    | 0.61     | 0.13     | 139      | 0.9     | 2.4      | 0.058    | 0.11     |
| 14          | 0.61     | 0.14     | 0.43     | 0.7      | < 0.002  | 0.28     | 0.014    | 1.1      | 0.19     | 169      | 0.7     | 1.3      | 0.12     | < 0.03   |
| 15          | 0.4      | 0.071    | 0.4      | 0.4      | 0.054    | 0.12     | 0.011    | 5.4      | < 0.01   | 310      | 2.4     | 13       | 0.029    | NA       |
| 16          | 0.4      | 0.054    | 0.45     | < 0.3    | 0.008    | 0.03     | 0.02     | 3.2      | < 0.01   | 430      | 0.9     | 11       | 0.014    | NA       |
| 17          | 0.1      | 0.082    | 1        | 1.5      | 0.016    | 0.14     | < 0.006  | 2.5      | < 0.01   | 1900     | 0.6     | 9.2      | 0.024    | NA       |
| 18          | 0.5      | 0.019    | 0.3      | 0.7      | 0.011    | 0.09     | 0.017    | 3        | 0.23     | 240      | < 0.40  | 5.8      | 0.006    | NA       |
| 19          | 0.38     | 0.2      | 0.31     | < 2.0    | 0.019    | 0.3      | 0.032    | 2.8      | 0.1      | 640      | 2       | 1.4      | 0.013    | NA       |
| 20          | 0.6      | 0.072    | 0.73     | 0.5      | 0.063    | 0.09     | 0.027    | 5.4      | < 0.01   | 2300     | 1.5     | 13       | 0.014    | NA       |
| 21          | < 0.10   | < 0.10   | 0.4      | < 2.0    | 0.022    | 0.6      | 0.0042   | 3        | < 2.00   | 1182     | 0.23    | 1.8      | 0.043    | NA       |
| 22          | 0.5      | 0.08     | 0.82     | < 0.30   | 0.27     | 0.04     | 0.047    | 4.8      | < 0.01   | 2400     | < 0.40  | 43       | 0.02     | NA       |
| 23          | < 0.2    | < 2      | 0.38     | 5010     | 0.068    | 83       | 0.049    | 8.8      | < 4      | 2455     | 0.12    | 14       | 0.27     | 0.08     |
| 24          | 0.95     | < 0.10   | 0.48     | 21       | 0.02     | 1.9      | 0.028    | 0.9      | < 0.4    | 344      | 6.2     | 6.6      | 0.025    | < 0.10   |
| 25          | 0.53     | 0.2      | 5.4      | < 0.7    | 0.16     | 0.19     | 0.018    | 0.9      | < 0.4    | 372      | 3.3     | 20       | 0.034    | < 0.10   |
| 26          | 0.47     | 0.2      | 0.6      | < 0.7    | 0.13     | 0.16     | 0.014    | 0.9      | < 0.4    | 422      | 4       | 9.1      | 0.04     | < 0.10   |
| 27          | < 0.10   | 0.4      | 0.49     | < 2      | 0.015    | 0.3      | 0.02     | 5.3      | < 2.0    | 2800     | 1.3     | 16       | 0.12     | NA       |
| 28          | 0.6      | 0.097    | 0.49     | 0.4      | 0.055    | 0.02     | 0.018    | 0.23     | < 0.01   | 470      | 6.7     | 8.2      | 0.012    | NA       |

| Site Number | Al, µg/L | Ce, µg/L | Cs, µg/L | Ga, µg/L | Li, µg/L | Rb, µg/L | Se, µg/L | Ti, µg/L | W, µg/L | Zr, µg/L | La, µg/L | Sc, µg/L | Yb, µg/L | Y, µg/L |
|-------------|----------|----------|----------|----------|----------|----------|----------|----------|---------|----------|----------|----------|----------|---------|
| 1           | 19       | 0.13     | NA       | 0.014    | 131      | 16       | NA       | < 0.1    | NA      | 0.36     | 0.086    | NA       | 0.018    | 0.41    |
| 2           | < 0.1    | 0.0003   | 0.89     | NA       | 5.6      | 5        | 3        | NA       | 0.01    | 0.002    | 0.0026   | NA       | < 0.0007 | 0.01    |
| 3           | 0.2      | 0.001    | 2        | NA       | 10       | 8        | 5        | NA       | 0.02    | 0.005    | 0.0013   | NA       | < 0.0002 | 0.004   |
| 4           | < 0.1    | 0.0014   | 0.82     | NA       | 9.3      | 8        | 2        | NA       | 0.02    | < 0.004  | 0.0039   | NA       | 0.0003   | 0.01    |
| 5           | 0.9      | 0.0007   | NA       | 0.002    | 2.5      | 2.9      | 1.6      | NA       | NA      | NA       | 0.0059   | NA       | < 0.0003 | 0.007   |
| 6           | 0.1      | 0.0016   | 0.68     | NA       | 40       | 12       | 6        | NA       | 0.01    | 0.007    | 0.02     | NA       | 0.0036   | 0.07    |
| 7           | NA       | 0.0023   | NA       | 0.001    | 12       | 4.6      | 4.9      | < 0.05   | NA      | 0.007    | 0.0086   | NA       | 0.0011   | 0.025   |
| 8           | 0.7      | < 0.0004 | NA       | 0.002    | 8.8      | 8.3      | 5.1      | < 0.07   | NA      | 0.002    | 0.0018   | NA       | < 0.0004 | 0.005   |
| 9           | < 0.30   | < 0.0004 | NA       | 0.002    | 4.8      | 3.1      | 3.4      | < 0.05   | NA      | 0.006    | 0.008    | NA       | 0.0003   | 0.01    |
| 10          | 1.4      | 0.0025   | NA       | 0.001    | 24       | 8.1      | 6.7      | < 0.05   | NA      | 0.021    | 0.0048   | NA       | 0.0013   | 0.024   |
| 11          | < 0.3    | 0.0018   | 0.51     | NA       | 20       | 7        | 11       | NA       | 0.01    | < 0.003  | 0.0004   | NA       | < 0.0003 | 0.003   |
| 12          | < 0.3    | 0.0007   | 0.72     | NA       | 5.5      | 4        | 3        | NA       | 0.01    | 0.005    | 0.0024   | NA       | < 0.0003 | 0.004   |
| 13          | 0.7      | < 0.0005 | NA       | 0.002    | 5.2      | 3.5      | 3.3      | 0.07     | NA      | 0.003    | 0.0043   | NA       | < 0.0004 | 0.006   |
| 14          | 0.7      | < 0.0005 | NA       | 0.002    | 4.8      | 3.4      | 3.4      | 0.09     | NA      | 0.012    | 0.0025   | NA       | < 0.0004 | 0.004   |
| 15          | 0.7      | 0.002    | 0.94     | NA       | 21       | 11       | 13       | NA       | NA      | 0.014    | 0.0018   | < 0.10   | 0.0004   | 0.012   |
| 16          | 0.2      | 0.0008   | 0.67     | NA       | 20       | 7.9      | 8.2      | NA       | NA      | 0.0082   | 0.0016   | < 0.10   | 0.0004   | 0.018   |
| 17          | 1.1      | 0.0023   | 0.15     | NA       | 30       | 7.4      | 14       | NA       | NA      | 0.016    | 0.0084   | 0.2      | 0.0012   | 0.032   |
| 18          | 0.23     | 0.001    | 0.096    | NA       | 22       | 7.7      | 17       | NA       | NA      | 0.007    | 0.0019   | < 0.10   | 0.0006   | 0.018   |
| 19          | 0.4      | 0.0005   | NA       | 0.002    | 14       | 4.1      | 7.9      | NA       | NA      | NA       | 0.0051   | NA       | 0.0013   | 0.028   |
| 20          | 0.5      | 0.0021   | 0.3      | NA       | 45       | 11       | 13       | NA       | NA      | 0.012    | 0.003    | < 0.10   | 0.0008   | 0.026   |
| 21          | 2.7      | 0.0062   | NA       | 0.002    | 53       | 10       | 8.5      | NA       | NA      | NA       | 0.0059   | NA       | 0.0009   | 0.031   |
| 22          | 0.6      | 0.0025   | 0.46     | NA       | 25       | 6.7      | 11       | NA       | NA      | 0.02     | 0.0016   | < 0.10   | 0.0009   | 0.03    |
| 23          | 0.9      | 0.0008   | NA       | 0.014    | 42       | 9.6      | 2.6      | < 1      | NA      | 10       | 0.0009   | NA       | < 0.0004 | 0.027   |
| 24          | 0.7      | 0.0006   | NA       | 0.002    | 121      | 13       | 2.3      | < 0.05   | NA      | 0.042    | 0.0062   | NA       | 0.0036   | 0.097   |
| 25          | 0.4      | 0.001    | NA       | 0.001    | 122      | 12       | 1.6      | < 0.05   | NA      | 0.029    | 0.0032   | NA       | 0.0004   | 0.008   |
| 26          | 1        | 0.0036   | NA       | 0.001    | 124      | 10       | 2        | < 0.05   | NA      | 0.015    | 0.0043   | NA       | < 0.0003 | 0.007   |
| 27          | 0.9      | 0.0005   | NA       | 0.003    | 31       | 2.2      | 9.1      | NA       | NA      | NA       | 0.0022   | NA       | < 0.0002 | 0.027   |
| 28          | 0.3      | 0.0009   | 3.1      | NA       | 230      | 17       | 1.1      | NA       | NA      | 0.086    | 0.0081   | 0.2      | 0.0046   | 0.089   |

| Site Number | Er, µg/L | Eu, µg/L | Gd, µg/L  | Ho, µg/L  | Nd, µg/L | Pr, µg/L | Re, µg/L | Te, µg/L | Tb, µg/L  | Tm, µg/L  |
|-------------|----------|----------|-----------|-----------|----------|----------|----------|----------|-----------|-----------|
| 1           | 0.026    | 0.0056   | 0.033     | 0.0077    | 0.11     | 0.024    | NA       | < 0.020  | 0.0061    | 0.0033    |
| 2           | < 0.0004 | 0.0009   | < 0.0004  | < 0.0001  | 0.0019   | 0.0002   | 0.01     | < 0.01   | < 0.0001  | < 0.0001  |
| 3           | 0.0006   | 0.0004   | < 0.0004  | < 0.0001  | 0.016    | 0.0003   | 0.02     | < 0.01   | 0.0001    | < 0.0001  |
| 4           | < 0.0003 | 0.02     | 0.0007    | 0.0001    | 0.0029   | 0.0002   | 0.01     | 0.01     | 0.0001    | < 0.0001  |
| 5           | < 0.0004 | < 0.0002 | < 0.0003  | 0.0001    | 0.0037   | < 0.0001 | NA       | < 0.04   | < 0.00010 | < 0.00006 |
| 6           | 0.0003   | 0.0023   | 0.01      | 0.0016    | 0.03     | 0.01     | 0.03     | 0.01     | 0.0012    | 0.0005    |
| 7           | 0.0014   | 0.001    | 0.0018    | 0.00048   | 0.0089   | 0.0017   | NA       | < 0.0030 | 0.00039   | 0.0002    |
| 8           | < 0.0008 | < 0.0002 | < 0.0006  | < 0.00010 | 0.0009   | < 0.0001 | NA       | < 0.003  | < 0.00020 | < 0.00010 |
| 9           | < 0.0003 | < 0.0002 | 0.0006    | 0.00013   | 0.0056   | 0.00048  | NA       | < 0.003  | 0.00006   | < 0.00008 |
| 10          | 0.0014   | 0.0006   | 0.0012    | 0.00041   | 0.005    | 0.00083  | NA       | < 0.0030 | 0.00025   | 0.00012   |
| 11          | < 0.0002 | 0.0009   | 0.0003    | 0.0001    | 0.0011   | < 0.0002 | 0.14     | < 0.01   | < 0.0001  | < 0.0001  |
| 12          | < 0.0002 | 0.01     | 0.0002    | < 0.0001  | 0.0026   | < 0.0002 | 0.03     | < 0.01   | < 0.0001  | < 0.0001  |
| 13          | < 0.0005 | 0.006    | < 0.0006  | < 0.00009 | 0.0036   | < 0.0001 | NA       | < 0.0050 | < 0.00010 | < 0.00010 |
| 14          | < 0.0005 | 0.0017   | < 0.0006  | < 0.00009 | 0.0021   | < 0.0001 | NA       | < 0.005  | < 0.00010 | < 0.00010 |
| 15          | 0.0008   | 0.0015   | 0.0006    | 0.0002    | 0.0019   | 0.0002   | 0.071    | 0.023    | < 0.00010 | < 0.00010 |
| 16          | 0.0005   | 0.0015   | 0.0013    | 0.0003    | 0.0022   | 0.0002   | 0.053    | 0.041    | 0.0002    | 0.0001    |
| 17          | 0.0009   | 0.0006   | 0.0025    | 0.0006    | 0.007    | 0.0012   | 0.19     | 0.03     | 0.0005    | 0.0002    |
| 18          | 0.0007   | < 0.0002 | 0.0013    | 0.0003    | 0.0013   | 0.0005   | 0.11     | 0.019    | 0.0001    | 0.0002    |
| 19          | 0.0013   | 0.0004   | 0.0016    | 0.0004    | 0.0068   | 0.0014   | NA       | < 0.04   | 0.00027   | 0.0002    |
| 20          | 0.0014   | < 0.0003 | 0.001     | 0.0003    | 0.0027   | 0.0005   | 0.1      | 0.02     | 0.0005    | 0.0001    |
| 21          | 0.0013   | < 0.0002 | 0.0016    | 0.0003    | 0.0061   | 0.0014   | NA       | < 0.004  | 0.0003    | 0.00023   |
| 22          | 0.0013   | 0.0005   | 0.0017    | 0.0004    | 0.0027   | 0.0004   | 0.15     | 0.037    | 0.0007    | 0.0001    |
| 23          | < 0.0005 | < 0.0001 | < 0.0005  | < 0.00010 | < 0.0010 | 0.0005   | NA       | < 0.010  | < 0.00009 | < 0.00010 |
| 24          | 0.0046   | 0.0036   | 0.0024    | 0.0011    | 0.0064   | 0.00076  | NA       | < 0.003  | 0.00042   | 0.00054   |
| 25          | < 0.0003 | < 0.0002 | 0.0003    | < 0.00007 | 0.0023   | < 0.0001 | NA       | < 0.0030 | < 0.00004 | < 0.00008 |
| 26          | < 0.0003 | < 0.0002 | < 0.00020 | < 0.00007 | 0.0036   | 0.00046  | NA       | < 0.0030 | < 0.00004 | < 0.00008 |
| 27          | < 0.0006 | < 0.0002 | 0.0006    | < 0.00010 | 0.0016   | 0.0004   | NA       | 0.01     | < 0.00006 | < 0.00009 |
| 28          | 0.005    | 0.0018   | 0.0082    | 0.0012    | 0.012    | 0.0015   | 0.0086   | 0.035    | 0.0007    | 0.0005    |

| Site Number | Lu, µg/L  | Sm, µg/L | Dy, µg/L  | Th, µg/L | U, µg/L | U-238, pCi/L | U-234, pCi/L | U-235, pCi/L | Sr-87/Sr-86 ratio | δ <sup>13</sup> C, unfilt, per mil | δ <sup>2</sup> H, unfilt, per mil | δ <sup>18</sup> O, unfilt, per mil |
|-------------|-----------|----------|-----------|----------|---------|--------------|--------------|--------------|-------------------|------------------------------------|-----------------------------------|------------------------------------|
| 1           | 0.0027    | 0.027    | 0.036     | 0.0056   | 4.6     | 1.48         | 4.2          | 0.07         | 0.70956           | -2.81                              | -82.4                             | -11.43                             |
| 2           | < 0.0002  | 0.0016   | < 0.0006  | < 0.001  | 1.7     | NA           | NA           | NA           | 0.71164           | -8.59                              | -94.2                             | -12.7                              |
| 3           | < 0.0001  | < 0.0007 | 0.0004    | 0.0011   | 4.1     | NA           | NA           | NA           | 0.7125            | -8.05                              | -91.4                             | -12.2                              |
| 4           | < 0.0001  | 0.0008   | 0.0004    | 0.001    | 3.1     | NA           | NA           | NA           | 0.71196           | -7.69                              | -93.1                             | -12.26                             |
| 5           | < 0.0001  | 0.0014   | < 0.0003  | < 0.0004 | 1       | 0.32         | 1.6          | 0.05         | NA                | -9.18                              | -93.7                             | -12.9                              |
| 6           | 0.0004    | 0.01     | 0.01      | 0.0003   | 6       | NA           | NA           | NA           | NA                | NA                                 | -89.1                             | -11.9                              |
| 7           | 0.00015   | 0.0023   | 0.0029    | 0.0008   | 2.2     | NA           | NA           | NA           | NA                | -10.68                             | -90.8                             | -12.4                              |
| 8           | < 0.0002  | < 0.0007 | < 0.00040 | < 0.0020 | 13      | 4.8          | 10           | 0.24         | 0.71008           | -7.69                              | -89                               | -12.16                             |
| 9           | < 0.00007 | 0.0026   | 0.0005    | 0.0006   | 1.7     | NA           | NA           | NA           | NA                | -9.07                              | -92.2                             | -12.38                             |
| 10          | 0.00016   | 0.0013   | 0.0012    | 0.005    | 7.2     | NA           | NA           | NA           | NA                | -11.9                              | -87.8                             | -11.7                              |
| 11          | < 0.0001  | 0.0006   | 0.0005    | 0.0004   | 31      | NA           | NA           | NA           | NA                | NA                                 | -90.2                             | -12.1                              |
| 12          | < 0.0001  | 0.0015   | < 0.0003  | < 0.0002 | 7.1     | NA           | NA           | NA           | 0.7107            | -7.96                              | -91.1                             | -12.2                              |
| 13          | < 0.0001  | 0.0016   | < 0.0005  | 0.0012   | 2       | 0.63         | 2.06         | 0.06         | 0.71014           | -8.75                              | -89.5                             | -11.91                             |
| 14          | < 0.00010 | 0.0007   | < 0.0005  | 0.0025   | 1.4     | 0.63         | 1.59         | 0.09         | 0.70944           | -8.25                              | -89.8                             | -11.93                             |
| 15          | < 0.00010 | < 0.0008 | < 0.0004  | 0.003    | 10      | NA           | NA           | NA           | NA                | NA                                 | -82.78                            | -10.33                             |
| 16          | 0.0001    | < 0.0008 | 0.001     | 0.0015   | 8.7     | NA           | NA           | NA           | NA                | NA                                 | -89.03                            | -11.92                             |
| 17          | < 0.0001  | 0.0022   | 0.0022    | 0.0057   | 14      | NA           | NA           | NA           | NA                | NA                                 | -81.36                            | -10.78                             |
| 18          | 0.0002    | 0.0008   | 0.0009    | 0.0021   | 4.4     | NA           | NA           | NA           | NA                | -6.9                               | -91.09                            | -12.09                             |
| 19          | 0.00015   | 0.0021   | 0.0026    | 0.0005   | 2.7     | 1.15         | 2.3          | 0.06         | NA                | -9.76                              | -84.5                             | -11.41                             |
| 20          | < 0.0001  | < 0.0008 | 0.0009    | 0.0046   | 7.5     | NA           | NA           | NA           | NA                | NA                                 | -80.83                            | -10.99                             |
| 21          | 0.0002    | 0.0011   | 0.002     | 0.00039  | 5.8     | 2.3          | 3            | 0.11         | NA                | -10.84                             | -80.1                             | -10.64                             |
| 22          | 0.0002    | < 0.0008 | 0.0012    | 0.014    | 6.6     | NA           | NA           | NA           | NA                | -5                                 | -87.78                            | -11.74                             |
| 23          | < 0.0001  | < 0.0008 | 0.0006    | 0.023    | 1.2     | 0.37         | 1.1          | 0.037        | 0.70801           | NA                                 | -111                              | -14.54                             |
| 24          | 0.00061   | 0.0017   | 0.004     | 0.0031   | 3.6     | 1.39         | 3.8          | 0.09         | 0.71062           | -3.73                              | -86.2                             | -11.82                             |
| 25          | 0.00008   | < 0.0006 | < 0.0002  | 0.0013   | 3.7     | 1.28         | 3.1          | 0.057        | 0.71047           | -3.87                              | -85.9                             | -11.76                             |
| 26          | < 0.00007 | 0.0009   | < 0.0002  | 0.0023   | 3.1     | 0.98         | 2.2          | 0.08         | 0.71064           | -3.53                              | -85.2                             | -11.74                             |
| 27          | < 0.0001  | < 0.0005 | < 0.0005  | 0.00039  | 6.9     | 2            | 6            | 0.17         | NA                | -8.19                              | -85.5                             | -11.29                             |
| 28          | 0.0006    | 0.0042   | 0.0051    | 0.0013   | 4.6     | NA           | NA           | NA           | NA                | NA                                 | -80.76                            | -10.96                             |

| Site Number | Alkalinity, field, mg/L as CaCO <sub>3</sub> | Alkalinity, laboratory, mg/L as CaCO <sub>3</sub> | Bicarbonate, field, mg/L | Carbonate, field, mg/L | Bromide, µg/L | Ammonia, mg/L as N | Nitrite, mg/L as N | Nitrate, mg/L as N | <sup>14</sup> C, percent modern | <sup>14</sup> C counting error, percent modern | Tritium, unfilt, pCi/L |
|-------------|----------------------------------------------|---------------------------------------------------|--------------------------|------------------------|---------------|--------------------|--------------------|--------------------|---------------------------------|------------------------------------------------|------------------------|
| 1           | 640                                          | NA                                                | 780                      | 0.3                    | NA            | NA                 | NA                 | 0.28               | 3.49                            | 0.07                                           | NA                     |
| 2           | 130                                          | NA                                                | 156                      | 1                      | 33            | 0.01               | 0.001              | 0.76               | 49.23                           | 0.47                                           | 2.2                    |
| 3           | 141                                          | NA                                                | 171                      | 2                      | 31            | < 0.020            | < 0.002            | 0.8                | 55.11                           | 0.4                                            | 3.5                    |
| 4           | 130                                          | NA                                                | 142                      | 8                      | 50            | < 0.010            | 0.002              | 1.2                | 71.07                           | 0.46                                           | 2.2                    |
| 5           | 191                                          | NA                                                | 231                      | 0.6                    | NA            | < 0.01             | 0.004              | 0.25               | 51.33                           | 0.13                                           | 1.5                    |
| 6           | 155                                          | NA                                                | 187                      | 0                      | 42            | < 0.040            | < 0.001            | 0.3                | NA                              | NA                                             | 5.1                    |
| 7           | 231                                          | NA                                                | 281                      | 0.4                    | NA            | < 0.01             | 0.012              | 0.2                | 50.18                           | 0.16                                           | 1                      |
| 8           | 201                                          | NA                                                | 244                      | 0.4                    | NA            | < 0.01             | < 0.001            | 0.19               | 16.8                            | 0.15                                           | R -0.5                 |
| 9           | 212                                          | NA                                                | 258                      | 0.3                    | NA            | < 0.01             | < 0.001            | 0.39               | 42.66                           | 0.14                                           | R -0.1                 |
| 10          | 216                                          | NA                                                | 263                      | 0.2                    | NA            | < 0.01             | < 0.001            | 1.24               | 74.82                           | 0.21                                           | 2.8                    |
| 11          | 153                                          | NA                                                | 184                      | 1                      | 32            | < 0.030            | < 0.001            | 0.58               | NA                              | NA                                             | NA                     |
| 12          | 201                                          | NA                                                | 244                      | 0                      | 43            | < 0.100            | < 0.001            | 5.7                | 41.54                           | 0.35                                           | 1.9                    |
| 13          | 176                                          | NA                                                | 213                      | 0.5                    | NA            | < 0.01             | < 0.001            | 0.92               | 31.93                           | 0.14                                           | 0.6                    |
| 14          | 170                                          | NA                                                | 206                      | 0.7                    | NA            | 0.02               | < 0.001            | 0.78               | 27.72                           | 0.12                                           | 0.6                    |
| 15          | NA                                           | 177                                               | NA                       | NA                     | 56            | 0.027              | 0.003              | 0.71               | NA                              | NA                                             | NA                     |
| 16          | NA                                           | 215                                               | NA                       | NA                     | 30            | 0.059              | < 0.0010           | 0.22               | NA                              | NA                                             | NA                     |
| 17          | NA                                           | 222                                               | NA                       | NA                     | 22            | 0.23               | < 0.0010           | < 0.02             | NA                              | NA                                             | NA                     |
| 18          | 147                                          | 167                                               | 175                      | NA                     | 29            | 0.026              | < 0.0010           | 0.51               | 54.8                            | 0.41                                           | 1.6                    |
| 19          | 200                                          | NA                                                | 243                      | 0.3                    | NA            | < 0.01             | < 0.001            | 0.64               | 44.34                           | 0.12                                           | 1.7                    |
| 20          | 132                                          | NA                                                | NA                       | NA                     | 53            | 0.19               | < 0.0040           | 1.4                | NA                              | NA                                             | NA                     |
| 21          | 228                                          | NA                                                | 277                      | 0.4                    | NA            | < 0.01             | < 0.001            | 0.02               | 59.72                           | 0.17                                           | 7.4                    |
| 22          | 164                                          | 158                                               | 199                      | NA                     | 26            | 0.18               | 0.004              | 0.76               | 20.19                           | 0.22                                           | 2.2                    |
| 23          | 126                                          | NA                                                | 154                      | 0.1                    | NA            | < 0.02             | < 0.001            | < 0.002            | NA                              | NA                                             | R 0.2                  |
| 24          | 493                                          | NA                                                | 601                      | 0.1                    | NA            | 0.01               | < 0.001            | 0.32               | 5.2                             | 0.06                                           | R -0.2                 |
| 25          | 494                                          | NA                                                | 602                      | 0.1                    | NA            | 0.01               | < 0.001            | 0.2                | 8.39                            | 0.07                                           | R -0.1                 |
| 26          | 443                                          | NA                                                | 540                      | 0.2                    | NA            | < 0.01             | < 0.001            | 0.34               | 11.44                           | 0.07                                           | R 0.1                  |
| 27          | 123                                          | NA                                                | 150                      | 0.1                    | NA            | < 0.01             | < 0.001            | 0.067              | 55.99                           | 0.17                                           | 2.9                    |
| 28          | NA                                           | 695                                               | NA                       | NA                     | 50            | 0.18               | < 0.0040           | 0.79               | NA                              | NA                                             | NA                     |



## References

Bills DJ, Flynn ME, Monroe SA (2007) Hydrogeology of the Coconino Plateau and adjacent areas, Coconino and Yavapai Counties, Arizona: US Geological Survey Scientific Investigations Report 2005–5222, version 1.1, 101 p., 4 plates, <https://dx.doi.org/10.3133/sir20055222v1.1>.

Monroe SA, Antweiler RC, Hart RJ, Taylor HE, Truini Margot, Rihs JR, Felger TJ (2005) Chemical characteristics of ground-water discharge along the South Rim of Grand Canyon in Grand Canyon National Park, Arizona, 2000–2001: US Geological Survey Scientific Investigations Report 2004–5146, 59 p.

US Geological Survey (2019) National Water Information System: US Geological Survey web interface, accessed February 4, 2019, at <http://dx.doi.org/10.5066/F7P55KJN>.
